# Supplementary material
Source: Springer Nature journal article supplement (https://www.springermedizin.de/resource/supplementary/13054_2013_3025_MOESM1_ESM.pdf/9712420)

**A**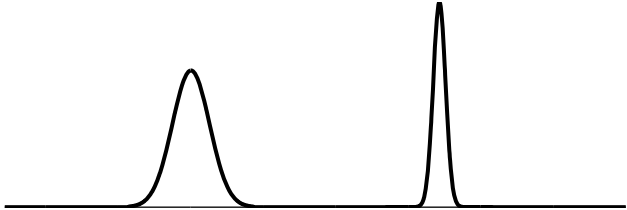**B**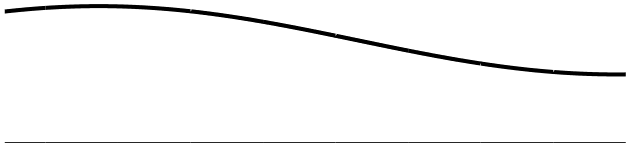

Supplement: MOESM1 [file 9712420]
